# Supplementary material for: Facile synthesis of well-dispersed Pd–graphene nanohybrids and their catalytic properties in 4-nitrophenol reduction
Source: Royal Society of Chemistry journal article supplement (doi:10.1039/c3ra47721e), 2014-01-01
Supplement: c3ra47721e1.pdf [file c3ra47721e1.pdf]

# Facile synthesis of well-dispersed Pd-graphene nanohybrids and their catalytic properties in 4-nitrophenol reduction

*Zhimin Wang\**, *Cuilian Xu*, *Guangqin Gao*, *Xin Li*

School of science, Henan Agricultural University, Zhengzhou 450002, People's Republic of China.

**Supplementary Materials**

---

\* Corresponding author. Tel: +86 - 371- 6355 - 8310. E-mail: [gary1451@iccas.ac.cn](mailto:gary1451@iccas.ac.cn) (Zhimin Wang)

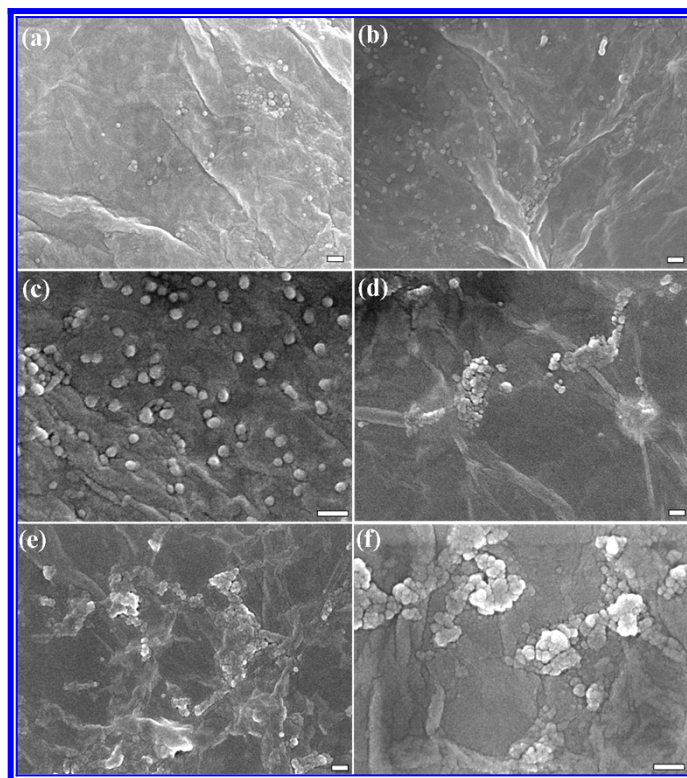

Fig. S1 SEM images of distribution of Pd nanoparticles on the surface of graphene for different Pd loading amounts. (a) 0.25 wt%;(b) 0.5 wt%; (c) 1.0 wt%; (d) 1.5 wt%; (e) 2.0 wt% and (f) 3.0 wt%. The scale bar in the images represents 100 nm.

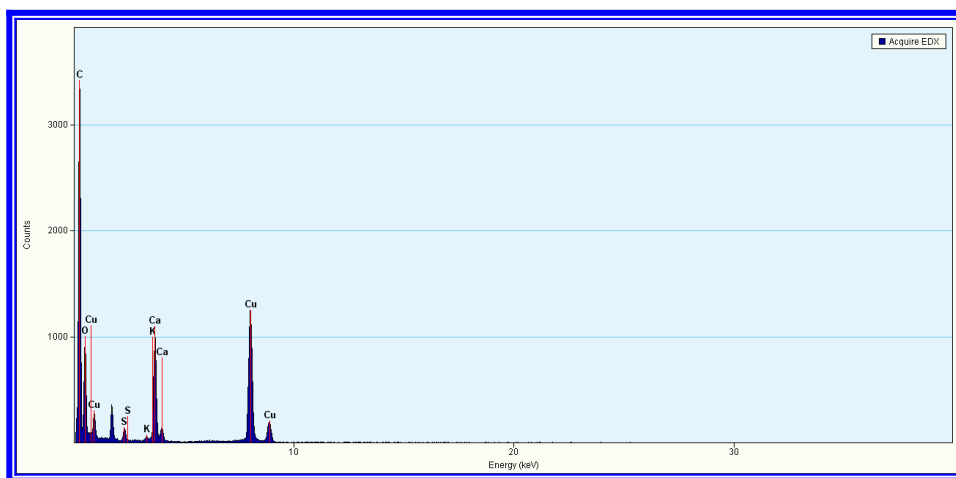

Fig. S2 EDX detection result for the Pd-FG hybrid on the blank region (the Cu peaks come from the copper grid).

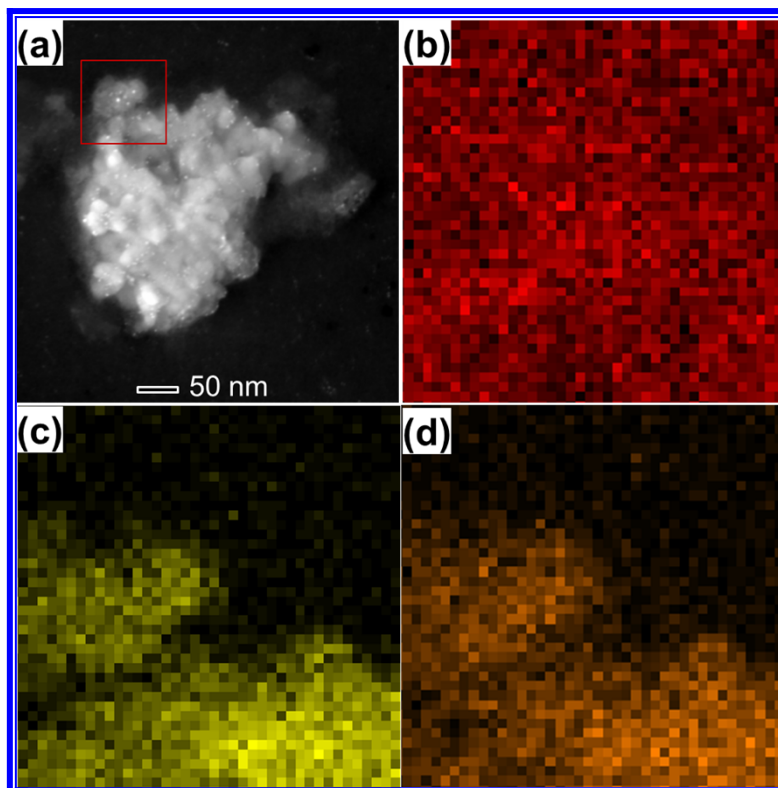

Fig. S3 HAADF/STEM image of the Pd-FG nano hybrid (a) and the EDS elemental mapping of (b) carbon, (c) Pd and (d) sulphur in the same square area in (a), depicting the distribution of the constituting elements.

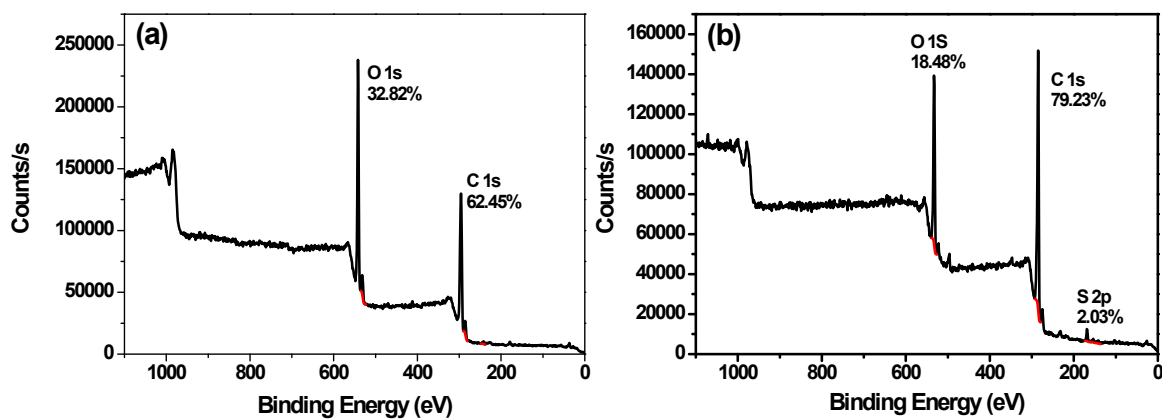

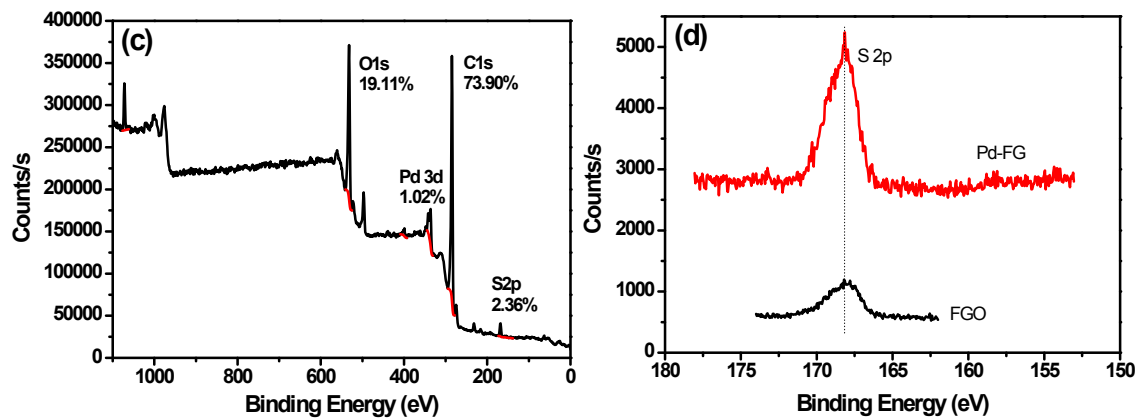

Fig. S4 XPS surveys of (a) GO, (b) FGO, (c) Pd-FG and (d) the sulphur region (S2p) scans of FGO and Pd-FG.

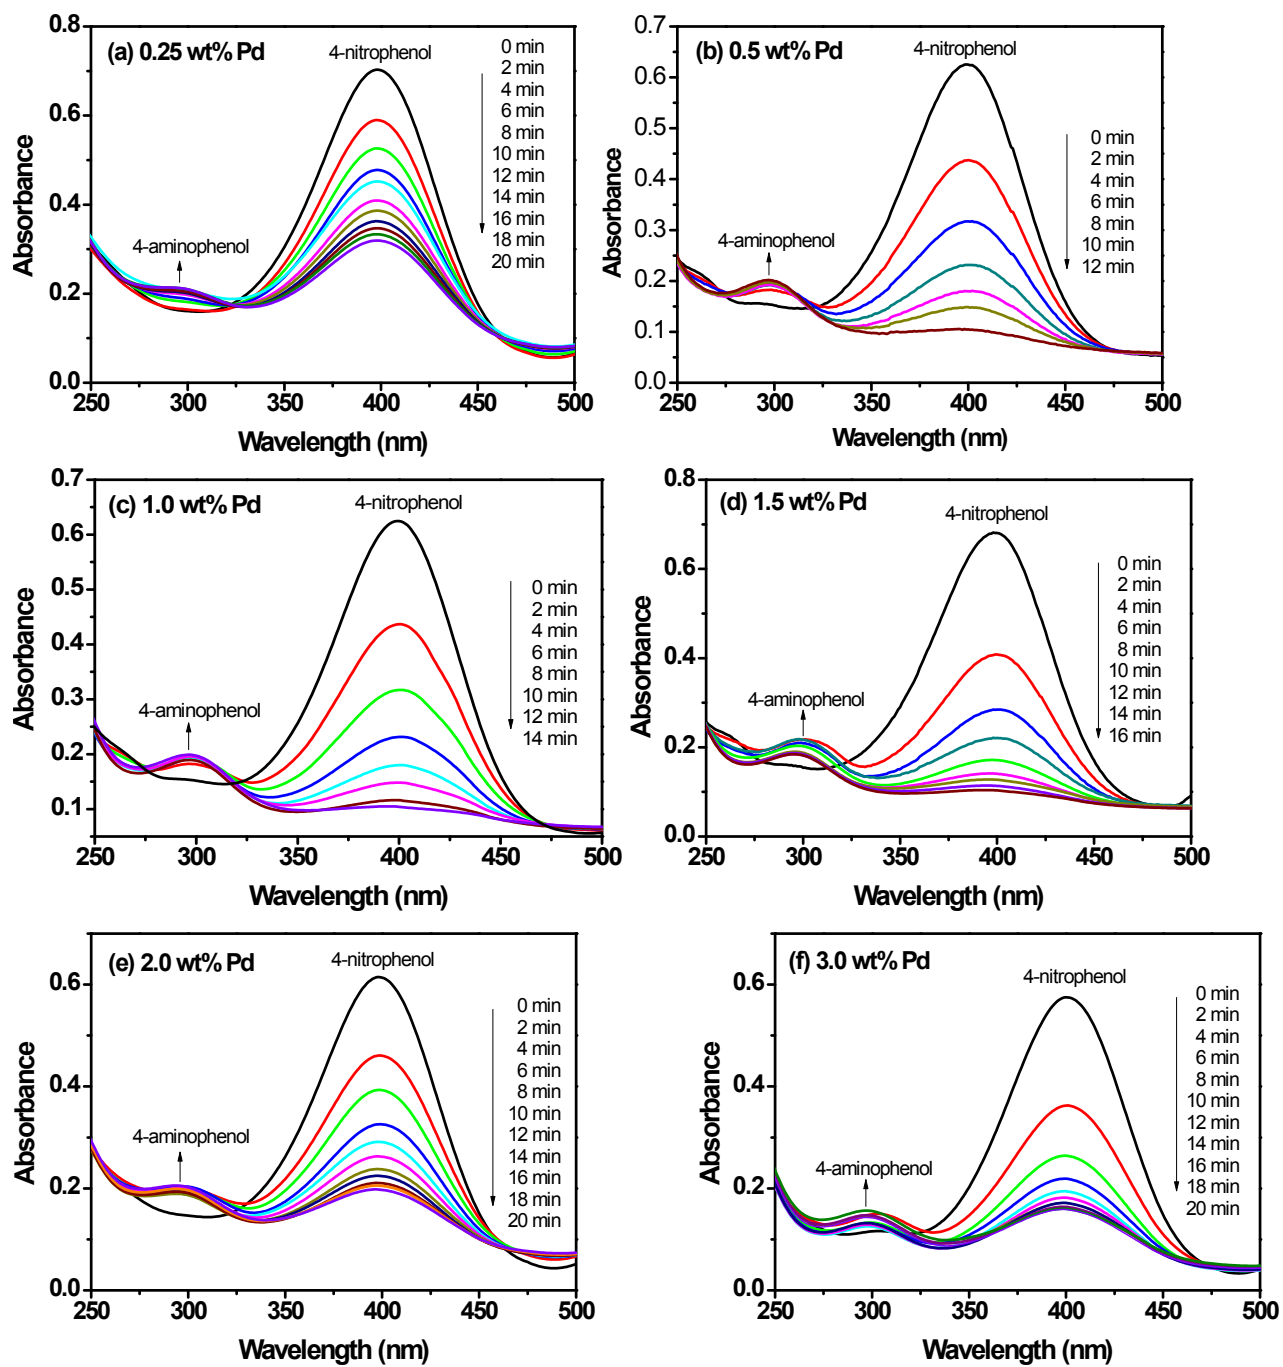

Fig. S5 UV-vis spectra of 0.1 mM 4-nitrophenol with 10 mM NaBH<sub>4</sub> in the presence of different Pd-FG catalysts. (a) 0.25 wt% Pd; (b) 0.5 wt%; (c) 1.0 wt% Pd; (d) 1.5 wt% Pd; (e) 2.0 wt% Pd; (f) 3.0 wt% Pd.

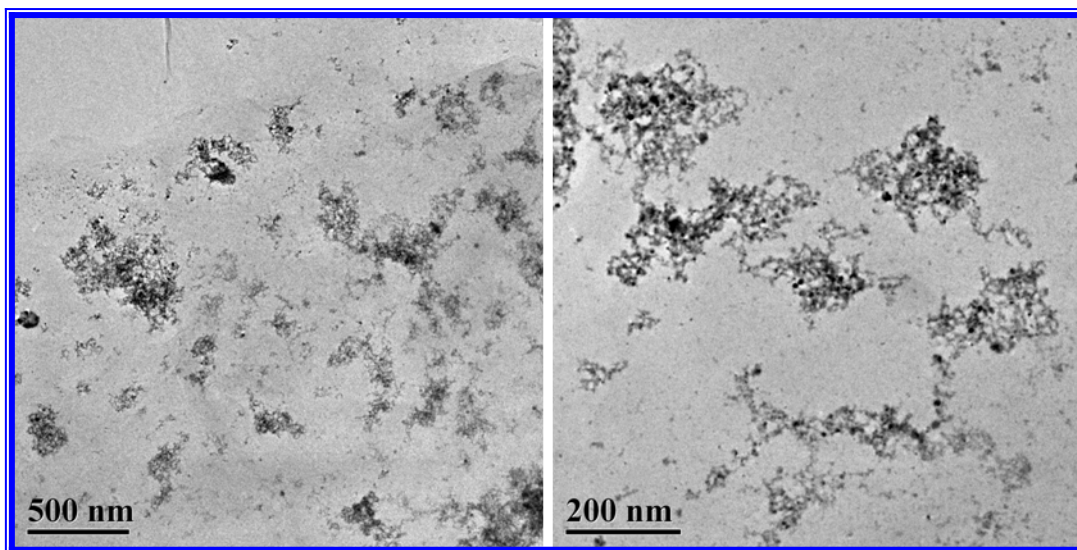

Fig. S6 Low (left) and high (right) magnified Transmission electron micrographs of Pd-FG catalyst cycled for five times.
